# Supplementary material
Source: PubMed Central journal article supplement (PMC3514589)
Supplement: NIHMS397768-supplement-S1.pdf [file NIHMS397768-supplement-S1.pdf]

| Frog ID     | Spawn   | Thx      | Metamorphosis       | Bleed   | Immunizations            | Sacrifice/<br>Harvest |
|-------------|---------|----------|---------------------|---------|--------------------------|-----------------------|
| 056.262.321 | 8/10/09 | -        | 9/10/09 to 10/10/09 | 7/28/11 | -                        | 10/7/11               |
| 056.263.571 | 2/10/09 | -        | 3/10/09 to 4/10/09  | 8/25/11 | -                        | 10/7/11               |
| 056.271.011 | 8/10/09 | -        | 9/10/09 to 10/10/09 | 8/25/11 | -                        | 10/7/11               |
| 056.282.258 | 10/2/10 | 10/13/10 | 11/2/10 to 12/2/10  | 5/26/11 | -                        | 10/7/11               |
| 056.280.606 | 10/2/10 | 10/13/10 | 11/2/10 to 12/2/10  | 5/26/11 | -                        | 10/7/11               |
| 056.277.339 | 5/6/10  | 5/17/10  | 6/6/10 to 7/6/10    | 5/26/11 | -                        | 10/7/11               |
| 056.106.606 | 8/10/09 | -        | 9/10/09 to 10/10/10 | 6/6/11  | 5/3/11, 5/10/11, 5/17/11 | 6/7/11                |
| 056.259.055 | 6/3/09  | -        | 7/3/09 to 8/3/09    | 6/6/11  | 5/3/11, 5/10/11, 5/17/11 | 6/7/11                |
| 040.080.063 | 9/8/09  | 9/18/09  | 10/8/09 to 11/8/09  | 6/6/11  | 5/3/11, 5/10/11, 5/17/11 | 6/7/11                |
| 040.080.105 | 9/8/09  | 9/18/09  | 10/8/09 to 11/8/09  | 6/6/11  | 5/3/11, 5/10/11, 5/17/11 | 6/7/11                |
| 040.593.882 | 8/10/09 | -        | 9/10/09 to 10/10/10 | 6/6/11  | 5/3/11, 5/10/11, 5/17/11 | 6/7/11                |
| 056.105.865 | 8/10/09 | -        | 9/10/09 to 10/10/10 | 6/6/11  | 5/3/11, 5/10/11, 5/17/11 | 6/7/11                |
| 040.065.593 | 9/8/09  | 9/18/09  | 9/10/09 to 10/10/10 | 6/6/11  | 5/3/11, 5/10/11, 5/17/11 | 6/7/11                |
| 048.531.048 | 9/8/09  | 9/18/09  | 9/10/09 to 10/10/10 | 6/6/11  | 5/3/11, 5/10/11, 5/17/11 | 6/7/11                |

**Supplemental Table 1. Timeline of frog manipulations.** After sacrifice, nucleic acid was prepared from non-immunized frog gut contents and lymphocytes were harvested for culture from immunized frogs. Only the last three digits of frog microchip numbers are used in other figures and text.

**Supplemental Table 2. Primers used in PCR.**

| Primer Name | For/Rev | Domain         | Sequence                    | Priming Site | Anneal Temp. |
|-------------|---------|----------------|-----------------------------|--------------|--------------|
| XI TCRAcf2  | F       | TCR $\alpha$ C | 5'-TCAATGTATCGCCTCAAAG-3'   | SMYRLK       | 53           |
| XI TCRAcR2  | R       | TCR $\alpha$ C | 5'-CATTCCACAGGACTGAAC-3'    | SSVLWN       | 54           |
| XI TCRdCF   | F       | TCR $\delta$ C | 5'-CACTGAAGCCTCAACAAGGTG-3' | ALKPQQG      | 61           |
| XI TCRdCR   | R       | TCR $\delta$ C | 5'-GATGCTTGGCTAGGCACTG-3'   | QCLAKH       | 60           |
| XITCRbF1    | F       | TCR $\beta$ C  | 5'-CGAACTGACCATGGCTACT-3'   | DPWLL        | 58           |
| XITCRbR1    | R       | TCR $\beta$ C  | 5'-CTCATTCTGGTGAGGCTGA-3'   | QPHQEV       | 58           |
| XIB2MF1     | F       | $\beta_2$ M    | 5'-AACATTAGTCCCCGGTGG-3'    | NISPPVW      | 60           |
| XIB2MR1     | R       | $\beta_2$ M    | 5'-GGGAGACCACATTCCACT-3'    | VECVVSH      | 60           |
| 530F        | F       | rRNAV4         | 5'-GTGCCAGCMGCGCGG-3'       |              | 60           |
| 1100R       | R       | rRNAV6         | 5'-GGGTTNCGNTCGTTR-3'       |              | 60           |

| Families                    | STO  | +/-    | SMI  | +/-   | LIN  | +/-   | NOR  | +/-   | THX  | +/-    |
|-----------------------------|------|--------|------|-------|------|-------|------|-------|------|--------|
| <b>P. ACTINOBACTERIA</b>    |      |        |      |       |      |       |      |       |      |        |
| <b>C. ACTINOBACTERIA</b>    |      |        |      |       |      |       |      |       |      |        |
| <b>O. ACTINOMYCETALES</b>   |      |        |      |       |      |       |      |       |      |        |
| Actinomycetaceae            | 0.00 | ±0.00  | 0.00 | ±0.00 | 0.00 | ±0.01 | 0.00 | ±0.00 | 0.00 | ±0.01  |
| Corynebacteriaceae          | 0.00 | ±0.00  | 0.00 | ±0.01 | 0.00 | ±0.00 | 0.00 | ±0.00 | 0.00 | ±0.01  |
| Microbacteriaceae           | 0.00 | ±0.00  | 0.00 | ±0.01 | 0.00 | ±0.00 | 0.00 | ±0.01 | 0.00 | ±0.00  |
| Nocardioideae               | 0.00 | ±0.00  | 0.01 | ±0.03 | 0.00 | ±0.00 | 0.00 | ±0.00 | 0.01 | ±0.02  |
| Scytonemataceae             | 0.01 | ±0.02  | 0.00 | ±0.00 | 0.00 | ±0.00 | 0.01 | ±0.02 | 0.00 | ±0.00  |
| <b>O. LENTISPHAERALES</b>   |      |        |      |       |      |       |      |       |      |        |
| Victivallaceae              | 0.01 | ±0.01  | 0.01 | ±0.01 | 0.00 | ±0.00 | 0.00 | ±0.01 | 0.00 | ±0.01  |
| <b>P. ARMATIMONADETES</b>   |      |        |      |       |      |       |      |       |      |        |
| <b>C. ARMATIMONADALES</b>   |      |        |      |       |      |       |      |       |      |        |
| Armatimonadaceae (OP10)     | 0.04 | ±0.10  | 0.00 | ±0.00 | 0.00 | ±0.00 | 0.03 | ±0.09 | 0.00 | ±0.00  |
| <b>P. BACTEROIDETES</b>     |      |        |      |       |      |       |      |       |      |        |
| <b>C. BACTEROIDIA</b>       |      |        |      |       |      |       |      |       |      |        |
| <b>O. BACTEROIDALES</b>     |      |        |      |       |      |       |      |       |      |        |
| Marinilabiaceae             | 0.03 | ±0.05  | 0.00 | ±0.00 | 0.38 | ±0.90 | 0.02 | ±0.03 | 0.26 | ±0.73  |
| Noctuoidea                  | 0.00 | ±0.01  | 0.01 | ±0.02 | 0.01 | ±0.02 | 0.01 | ±0.02 | 0.01 | ±0.01  |
| Porphyromonadaceae          | 1.22 | ±1.27  | 1.30 | ±1.91 | 3.71 | ±2.43 | 2.29 | ±2.20 | 1.87 | ±2.24  |
| Prevotellaceae              | 0.01 | ±0.02  | 0.00 | ±0.00 | 0.05 | ±0.07 | 0.01 | ±0.02 | 0.03 | ±0.06  |
| Rikenellaceae               | 0.28 | ±0.40  | 0.28 | ±0.32 | 3.31 | ±6.65 | 0.42 | ±0.40 | 2.17 | ±5.52  |
| <b>C. CYTOPHAGIA</b>        |      |        |      |       |      |       |      |       |      |        |
| <b>O. CYTOPHAGALES</b>      |      |        |      |       |      |       |      |       |      |        |
| Cytophagaceae               | 0.09 | ±0.14  | 0.00 | ±0.01 | 0.01 | ±0.02 | 0.01 | ±0.03 | 0.05 | ±0.11  |
| Flexibacteraceae            | 0.05 | ±0.05  | 1.00 | ±1.54 | 0.82 | ±1.49 | 0.29 | ±0.62 | 0.95 | ±1.62  |
| <b>O. FLAVOBACTERIALES</b>  |      |        |      |       |      |       |      |       |      |        |
| Flavobacteriaceae           | 7.44 | ±12.42 | 0.01 | ±0.03 | 0.08 | ±0.07 | 0.80 | ±2.03 | 4.22 | ±10.63 |
| <b>C. FLAVOBACTERIIA</b>    |      |        |      |       |      |       |      |       |      |        |
| <b>O. FLAVOBACTERIALES</b>  |      |        |      |       |      |       |      |       |      |        |
| Cryomorphaceae              | 0.00 | ±0.00  | 0.00 | ±0.00 | 0.01 | ±0.01 | 0.00 | ±0.00 | 0.01 | ±0.01  |
| <b>P. CYANOBACTERIA</b>     |      |        |      |       |      |       |      |       |      |        |
| <b>O. NOSTOCALES</b>        |      |        |      |       |      |       |      |       |      |        |
| Nostocaceae                 | 0.77 | ±1.14  | 0.00 | ±0.00 | 0.00 | ±0.00 | 0.24 | ±0.66 | 0.27 | ±0.82  |
| <b>O. OSCILLATORIALES</b>   |      |        |      |       |      |       |      |       |      |        |
| Oscillatoriaceae            | 1.02 | ±1.49  | 0.01 | ±0.02 | 0.00 | ±0.00 | 0.32 | ±0.86 | 0.36 | ±1.07  |
| Pseudanabaena               | 0.00 | ±0.01  | 0.00 | ±0.00 | 0.00 | ±0.00 | 0.00 | ±0.01 | 0.00 | ±0.00  |
| <b>O. SYNECHOCOCCALES</b>   |      |        |      |       |      |       |      |       |      |        |
| Synechococcaceae            | 0.00 | ±0.00  | 0.01 | ±0.02 | 0.00 | ±0.00 | 0.00 | ±0.01 | 0.00 | ±0.00  |
| <b>P. DEFERRIBACTERES</b>   |      |        |      |       |      |       |      |       |      |        |
| <b>C. DEFERRIBACTERES</b>   |      |        |      |       |      |       |      |       |      |        |
| <b>O. DEFERRIBACTERALES</b> |      |        |      |       |      |       |      |       |      |        |

|                                   |       |        |       |        |       |        |       |        |       |        |
|-----------------------------------|-------|--------|-------|--------|-------|--------|-------|--------|-------|--------|
| <b>Deferribacteraceae</b>         | 0.04  | ±0.06  | 0.27  | ±0.35  | 0.17  | ±0.19  | 0.20  | ±0.21  | 0.12  | ±0.27  |
| <b>P. FIRMICUTES</b>              |       |        |       |        |       |        |       |        |       |        |
| <b>C. BACILLI</b>                 |       |        |       |        |       |        |       |        |       |        |
| <b>O. BACILLALES</b>              |       |        |       |        |       |        |       |        |       |        |
| <b>Bacillaceae</b>                | 0.53  | ±0.42  | 0.46  | ±0.45  | 0.26  | ±0.15  | 0.48  | ±0.45  | 0.36  | ±0.25  |
| <b>Sphingomonadaceae</b>          | 0.09  | ±0.13  | 0.00  | ±0.00  | 0.00  | ±0.00  | 0.03  | ±0.08  | 0.03  | ±0.08  |
| <b>Thermoactinomycetaceae</b>     | 0.00  | ±0.00  | 0.01  | ±0.03  | 0.00  | ±0.00  | 0.00  | ±0.00  | 0.01  | ±0.02  |
| <b>O. LACTOBACILLALES</b>         |       |        |       |        |       |        |       |        |       |        |
| <b>Aerococcaceae</b>              | 0.00  | ±0.00  | 0.00  | ±0.01  | 0.00  | ±0.00  | 0.00  | ±0.00  | 0.00  | ±0.01  |
| <b>Carnobacteriaceae</b>          | 0.15  | ±0.16  | 0.07  | ±0.09  | 0.06  | ±0.08  | 0.11  | ±0.15  | 0.07  | ±0.07  |
| <b>Enterococcaceae</b>            | 0.02  | ±0.04  | 0.03  | ±0.04  | 0.00  | ±0.01  | 0.02  | ±0.03  | 0.01  | ±0.03  |
| <b>Lactobacillaceae</b>           | 0.06  | ±0.14  | 0.01  | ±0.01  | 0.00  | ±0.00  | 0.00  | ±0.01  | 0.04  | ±0.12  |
| <b>Paenibacillaceae</b>           | 0.00  | ±0.01  | 0.02  | ±0.02  | 0.01  | ±0.02  | 0.01  | ±0.01  | 0.02  | ±0.02  |
| <b>Staphylococcaceae</b>          | 0.05  | ±0.06  | 0.03  | ±0.03  | 0.00  | ±0.00  | 0.04  | ±0.05  | 0.02  | ±0.02  |
| <b>Streptococcaceae</b>           | 0.03  | ±0.05  | 0.10  | ±0.10  | 0.06  | ±0.06  | 0.06  | ±0.08  | 0.07  | ±0.07  |
| <b>C. CLOSTRIDIA</b>              |       |        |       |        |       |        |       |        |       |        |
| <b>O. CLOSTRIDIALES</b>           |       |        |       |        |       |        |       |        |       |        |
| <b>Catabacteriaceae</b>           | 0.01  | ±0.02  | 0.08  | ±0.11  | 0.15  | ±0.14  | 0.04  | ±0.05  | 0.11  | ±0.15  |
| <b>Clostridiaceae</b>             | 69.57 | ±25.71 | 75.63 | ±20.75 | 54.45 | ±22.38 | 68.33 | ±20.65 | 64.76 | ±25.81 |
| <b>Eubacteriaceae</b>             | 0.20  | ±0.21  | 1.68  | ±1.79  | 2.26  | ±2.10  | 1.14  | ±1.51  | 1.61  | ±2.02  |
| <b>Gracilibacteraceae</b>         | 0.00  | ±0.00  | 0.00  | ±0.01  | 0.00  | ±0.00  | 0.00  | ±0.01  | 0.00  | ±0.00  |
| <b>Lachnospiraceae</b>            | 0.12  | ±0.11  | 0.36  | ±0.42  | 0.37  | ±0.38  | 0.38  | ±0.40  | 0.18  | ±0.23  |
| <b>Oscillospiraceae</b>           | 0.01  | ±0.01  | 0.02  | ±0.05  | 0.04  | ±0.07  | 0.02  | ±0.04  | 0.03  | ±0.06  |
| <b>Ruminococcaceae</b>            | 0.19  | ±0.24  | 1.35  | ±1.37  | 2.36  | ±1.75  | 1.12  | ±1.31  | 1.48  | ±1.77  |
| <b>Peptococcaceae</b>             | 0.01  | ±0.02  | 0.11  | ±0.18  | 0.07  | ±0.09  | 0.03  | ±0.05  | 0.09  | ±0.16  |
| <b>Peptostreptococcaceae</b>      | 0.03  | ±0.03  | 0.01  | ±0.01  | 0.01  | ±0.02  | 0.02  | ±0.02  | 0.02  | ±0.02  |
| <b>Syntrophomonadaceae</b>        | 0.00  | ±0.00  | 0.04  | ±0.10  | 0.00  | ±0.00  | 0.00  | ±0.00  | 0.03  | ±0.09  |
| <b>O. THERMOANAEROBACTERIALES</b> |       |        |       |        |       |        |       |        |       |        |
| <b>Thermoanaerobacteraceae</b>    | 0.00  | ±0.00  | 0.00  | ±0.00  | 0.01  | ±0.02  | 0.00  | ±0.01  | 0.00  | ±0.01  |
| <b>C. ERYSIPELOTRICHI</b>         |       |        |       |        |       |        |       |        |       |        |
| <b>O. ERYSIPELOTRICHALES</b>      |       |        |       |        |       |        |       |        |       |        |
| <b>Erysipelotrichaceae</b>        | 1.07  | ±1.09  | 0.66  | ±0.69  | 1.78  | ±2.63  | 0.92  | ±1.00  | 1.42  | ±2.16  |
| <b>C. NEGATIVICUTES</b>           |       |        |       |        |       |        |       |        |       |        |
| <b>O. SELENOMONADALES</b>         |       |        |       |        |       |        |       |        |       |        |
| <b>Veillonellaceae</b>            | 0.08  | ±0.14  | 0.05  | ±0.07  | 0.14  | ±0.12  | 0.09  | ±0.12  | 0.09  | ±0.10  |
| <b>P. PROTEOBACTERIA</b>          |       |        |       |        |       |        |       |        |       |        |
| <b>C. ALPHAPROTEOBACTERIA</b>     |       |        |       |        |       |        |       |        |       |        |
| <b>O. CAULOBACTERIALES</b>        | 0.37  | ±0.50  | 0.52  | ±0.89  | 0.64  | ±0.75  | 0.57  | ±0.62  | 0.45  | ±0.80  |
| <b>O. CAULOBACTERIALES</b>        |       |        |       |        |       |        |       |        |       |        |
| <b>Caulobacteraceae</b>           | 0.01  | ±0.02  | 0.00  | ±0.00  | 0.01  | ±0.02  | 0.01  | ±0.02  | 0.00  | ±0.00  |
| <b>O. RHIZOBIALES</b>             |       |        |       |        |       |        |       |        |       |        |
| <b>Bradyrhizobiaceae</b>          | 0.05  | ±0.10  | 0.06  | ±0.13  | 0.05  | ±0.13  | 0.10  | ±0.15  | 0.01  | ±0.01  |
| <b>Hyphomicrobiaceae</b>          | 0.00  | ±0.01  | 0.00  | ±0.01  | 0.00  | ±0.01  | 0.00  | ±0.00  | 0.01  | ±0.01  |

|                               |      |        |      |       |      |       |      |        |      |       |
|-------------------------------|------|--------|------|-------|------|-------|------|--------|------|-------|
| Rhizobiaceae                  | 0.16 | ±0.25  | 0.00 | ±0.00 | 0.00 | ±0.00 | 0.04 | ±0.12  | 0.07 | ±0.19 |
| <b>O. RICKETTSIALES</b>       |      |        |      |       |      |       |      |        |      |       |
| Anaplasmataceae               | 0.00 | ±0.01  | 0.00 | ±0.01 | 0.00 | ±0.00 | 0.00 | ±0.01  | 0.00 | ±0.01 |
| <b>O. RHODOBACTERALES</b>     |      |        |      |       |      |       |      |        |      |       |
| Rhodobacteraceae              | 0.01 | ±0.02  | 0.00 | ±0.00 | 0.00 | ±0.00 | 0.00 | ±0.00  | 0.01 | ±0.02 |
| <b>O. RHODOSPIRILLALES</b>    |      |        |      |       |      |       |      |        |      |       |
| Fusobacteriaceae              |      |        |      |       |      |       |      |        |      |       |
| <b>O. Sphingomonadales</b>    |      |        |      |       |      |       |      |        |      |       |
| Planococcaceae                | 0.02 | ±0.02  | 0.00 | ±0.00 | 0.00 | ±0.00 | 0.00 | ±0.01  | 0.01 | ±0.02 |
| <b>C. BETAPROTEOBACTERIA</b>  |      |        |      |       |      |       |      |        |      |       |
| <b>O. BURKHOLDERIALES</b>     |      |        |      |       |      |       |      |        |      |       |
| Alcaligenaceae                | 0.01 | ±0.02  | 0.00 | ±0.00 | 0.00 | ±0.00 | 0.01 | ±0.02  | 0.00 | ±0.00 |
| Burkholderiaceae              | 0.13 | ±0.16  | 0.00 | ±0.00 | 0.00 | ±0.00 | 0.03 | ±0.07  | 0.06 | ±0.14 |
| Comamonadaceae                | 0.18 | ±0.17  | 0.02 | ±0.04 | 0.00 | ±0.00 | 0.02 | ±0.03  | 0.12 | ±0.16 |
| Oxalobacteraceae              | 0.04 | ±0.09  | 0.00 | ±0.01 | 0.01 | ±0.02 | 0.01 | ±0.02  | 0.03 | ±0.07 |
| <b>O. GALLIONELLES</b>        |      |        |      |       |      |       |      |        |      |       |
| Gallionellaceae               | 0.00 | ±0.00  | 0.00 | ±0.00 | 0.00 | ±0.01 | 0.00 | ±0.00  | 0.00 | ±0.01 |
| <b>O. HYDROGENOPHILALES</b>   |      |        |      |       |      |       |      |        |      |       |
| Hydrogenophilaceae            | 0.01 | ±0.01  | 0.00 | ±0.00 | 0.01 | ±0.03 | 0.00 | ±0.01  | 0.01 | ±0.02 |
| <b>O. NEISSERIALES</b>        |      |        |      |       |      |       |      |        |      |       |
| Neisseriaceae                 | 0.09 | ±0.16  | 0.02 | ±0.05 | 0.00 | ±0.00 | 0.02 | ±0.04  | 0.06 | ±0.14 |
| <b>O. NITROSOMONADALES</b>    |      |        |      |       |      |       |      |        |      |       |
| Nitrosomonadaceae             | 0.00 | ±0.00  | 0.00 | ±0.01 | 0.01 | ±0.02 | 0.01 | ±0.01  | 0.00 | ±0.00 |
| <b>C. DELTAPROTEOBACTERIA</b> |      |        |      |       |      |       |      |        |      |       |
| <b>O. BDELLOVIBRIONALES</b>   |      |        |      |       |      |       |      |        |      |       |
| Bdellovibrionaceae            | 0.00 | ±0.01  | 0.02 | ±0.04 | 0.01 | ±0.02 | 0.02 | ±0.03  | 0.01 | ±0.02 |
| <b>O. DESULFOVIBRIONALES</b>  |      |        |      |       |      |       |      |        |      |       |
| Desulfovibrionaceae           | 0.12 | ±0.25  | 1.34 | ±2.32 | 3.88 | ±3.56 | 1.74 | ±2.81  | 1.82 | ±2.99 |
| Geobacteraceae                | 0.00 | ±0.00  | 0.01 | ±0.02 | 0.00 | ±0.01 | 0.00 | ±0.00  | 0.01 | ±0.02 |
| <b>O. DESULFUROMONADALES</b>  |      |        |      |       |      |       |      |        |      |       |
| Pelobacteraceae               | 0.00 | ±0.00  | 0.00 | ±0.00 | 0.00 | ±0.01 | 0.00 | ±0.00  | 0.00 | ±0.01 |
| <b>C. GAMMAPROTEOBACTERIA</b> |      |        |      |       |      |       |      |        |      |       |
| <b>O. AEROMONADALES</b>       |      |        |      |       |      |       |      |        |      |       |
| Aeromonadaceae                | 0.18 | ±0.20  | 0.01 | ±0.01 | 0.00 | ±0.00 | 0.05 | ±0.14  | 0.07 | ±0.14 |
| <b>O. ALTEROMONADALES</b>     |      |        |      |       |      |       |      |        |      |       |
| Shewanellaceae                | 0.03 | ±0.04  | 0.00 | ±0.00 | 0.00 | ±0.00 | 0.01 | ±0.03  | 0.00 | ±0.01 |
| <b>O. CHROMATIALES</b>        |      |        |      |       |      |       |      |        |      |       |
| Chromatiaceae                 | 0.12 | ±0.26  | 0.00 | ±0.00 | 0.00 | ±0.00 | 0.01 | ±0.02  | 0.07 | ±0.22 |
| <b>O. ENTEROBACTERIALES</b>   |      |        |      |       |      |       |      |        |      |       |
| Enterobacteriaceae            | 7.67 | ±13.77 | 1.98 | ±4.75 | 1.86 | ±4.21 | 6.36 | ±11.54 | 1.31 | ±3.55 |
| <b>O. PSEUDOMONADALES</b>     |      |        |      |       |      |       |      |        |      |       |
| Moraxellaceae                 | 0.38 | ±0.56  | 0.01 | ±0.01 | 0.00 | ±0.01 | 0.01 | ±0.03  | 0.25 | ±0.48 |
| Pseudomonadaceae              | 0.09 | ±0.09  | 0.01 | ±0.02 | 0.01 | ±0.02 | 0.04 | ±0.07  | 0.04 | ±0.07 |

|                              |      |       |      |       |      |       |      |       |      |       |
|------------------------------|------|-------|------|-------|------|-------|------|-------|------|-------|
| <b>O. VIBRIONALES</b>        |      |       |      |       |      |       |      |       |      |       |
| Vibrionaceae                 | 0.04 | ±0.06 | 0.00 | ±0.00 | 0.00 | ±0.00 | 0.01 | ±0.03 | 0.02 | ±0.05 |
| <b>O. XANTHOMONADALES</b>    |      |       |      |       |      |       |      |       |      |       |
| Xanthomonadaceae             | 0.05 | ±0.10 | 0.01 | ±0.02 | 0.00 | ±0.00 | 0.01 | ±0.02 | 0.03 | ±0.08 |
| <b>P. SPIROCHAETES</b>       |      |       |      |       |      |       |      |       |      |       |
| <b>C. SPIROCHAETIA</b>       |      |       |      |       |      |       |      |       |      |       |
| <b>O. SPIROCHAETALES</b>     |      |       |      |       |      |       |      |       |      |       |
| Spirochaetaceae              | 0.00 | ±0.00 | 0.00 | ±0.01 | 0.05 | ±0.09 | 0.01 | ±0.01 | 0.03 | ±0.08 |
| <b>P. SYNERGISTETES</b>      |      |       |      |       |      |       |      |       |      |       |
| <b>C. SYNERGISTIA</b>        |      |       |      |       |      |       |      |       |      |       |
| <b>O. SYNERGISTALES</b>      |      |       |      |       |      |       |      |       |      |       |
| Synergistaceae               | 0.22 | ±0.32 | 5.77 | ±8.19 | 1.74 | ±1.14 | 1.95 | ±2.06 | 3.21 | ±7.07 |
| <b>P. TENERICUTES</b>        |      |       |      |       |      |       |      |       |      |       |
| <b>C. MOLLICUTES</b>         |      |       |      |       |      |       |      |       |      |       |
| <b>O. ACHOLEPLASMATALES</b>  |      |       |      |       |      |       |      |       |      |       |
| Acholeplasmataceae           | 0.03 | ±0.06 | 0.08 | ±0.09 | 0.13 | ±0.19 | 0.07 | ±0.08 | 0.09 | ±0.16 |
| <b>O. ENTOMOPLASMATALES</b>  |      |       |      |       |      |       |      |       |      |       |
| Spiroplasmataceae            | 0.04 | ±0.09 | 0.19 | ±0.29 | 0.12 | ±0.14 | 0.07 | ±0.09 | 0.17 | ±0.26 |
| <b>O. MYCOPLASMATALES</b>    |      |       |      |       |      |       |      |       |      |       |
| Mycoplasmataceae             | 0.01 | ±0.01 | 0.00 | ±0.00 | 0.05 | ±0.13 | 0.00 | ±0.01 | 0.04 | ±0.10 |
| <b>P. VERRUCOMICROBIA</b>    |      |       |      |       |      |       |      |       |      |       |
| <b>C. OPITUTAE</b>           |      |       |      |       |      |       |      |       |      |       |
| Opitutaceae                  | 0.01 | ±0.02 | 0.00 | ±0.00 | 0.00 | ±0.00 | 0.00 | ±0.01 | 0.00 | ±0.00 |
| <b>O. PUNICEICOCCALES</b>    |      |       |      |       |      |       |      |       |      |       |
| Puniceicoccaceae             | 0.00 | ±0.00 | 0.01 | ±0.02 | 0.00 | ±0.00 | 0.00 | ±0.01 | 0.00 | ±0.00 |
| <b>C. VERRUCOMICROBIAE</b>   |      |       |      |       |      |       |      |       |      |       |
| <b>O. VERRUCOMICROBIALES</b> |      |       |      |       |      |       |      |       |      |       |
| Verrucomicrobiaceae          | 0.00 | ±0.01 | 0.01 | ±0.02 | 0.08 | ±0.16 | 0.01 | ±0.02 | 0.05 | ±0.13 |

**Supplemental Table 3. Percentage of 16S rRNA gene clones belonging to bacterial families. Averages +/- standard deviation of samples from stomach, small intestine, large intestine, normal (thymus intact) and thymectomized frogs.**

| common name                 | species                              | tree abbreviation | Ig    | C domains | accession #   |
|-----------------------------|--------------------------------------|-------------------|-------|-----------|---------------|
| zebrafish                   | <i>Danio rerio</i>                   | T zebrafish       | IgT   | 3         | AAT67446.1    |
| rainbow trout               | <i>Oncorhynchus mykiss</i>           | T trout           | IgT   | 4         | AAW66981.1    |
| Iberian ribbed newt         | <i>Pleurodeles waltl</i>             | M newt            | IgM   | 4         | CAE02685      |
|                             |                                      | Y newt            | IgY   | 4         | CAE02686      |
| Mexican axolotl             | <i>Ambystoma mexicanum</i>           | M axolotl         | IgM   | 4         | A46532        |
|                             |                                      | X axolotl         | IgX   | 4         | CAO82107.1    |
|                             |                                      | Y axolotl         | IgY   | 4         | X69492        |
| African clawed frog         | <i>Xenopus laevis</i>                | M frog            | IgM   | 4         | AAH84123      |
|                             |                                      | X frog            | IgX   | 4         | S03186        |
|                             |                                      | Y frog            | IgY   | 4         | AAH97629      |
| African clawed frog         | <i>Xenopus (Silurana) tropicalis</i> | F frog            | IgF   | 2         | MGC108125     |
| red-eared slider            | <i>Trachemys scripta elegans</i>     | M slider          | IgM   | 4         | AAB03838      |
| Chinese soft-shelled turtle | <i>Pelodiscus sinensis</i>           | M turtle          | IgM   | 4         | ACU45376.1    |
|                             |                                      | Y turtle          | IgY   | 4         | ACU45374.1    |
| green anole                 | <i>Anolis carolinensis</i>           | M anole           | IgM   | 4         | ABV66128      |
|                             |                                      | Y anole           | IgY   | 4         | ABV66132      |
| leopard gecko               | <i>Eublepharis macularius</i>        | M gecko           | IgM   | 4         | ABY74510.1    |
|                             |                                      | A gecko           | IgX/A | 4         | ABG72684.1    |
|                             |                                      | Y gecko           | IgY   | 4         | ACF60235.1    |
| duck                        | <i>Anas platyrhynchos</i>            | M duck            | IgM   | 4         | AAA68605.1    |
|                             |                                      | A duck            | IgA   | 4         | AAA68606.1    |
|                             |                                      | Y duck            | IgY   | 4         | CAA46322.1    |
| common pheasant             | <i>Phasianus colchicus</i>           | M pheasant        | IgM   | 4         | PMID 20398946 |
|                             |                                      | A pheasant        | IgA   | 4         | PMID 20398946 |
|                             |                                      | Y pheasant        | IgY   | 4         | PMID 20398946 |
| turkey                      | <i>Meleagris gallopavo</i>           | M turkey          | IgM   | 4         | PMID 20398946 |
|                             |                                      | A turkey          | IgA   | 4         | PMID 20398946 |
|                             |                                      | Y turkey          | IgY   | 4         | PMID 20398946 |
| quail                       | <i>Coturnix japonica</i>             | M quail           | IgM   | 4         | PMID 20398946 |
|                             |                                      | A quail           | IgA   | 4         | PMID 20398946 |
|                             |                                      | Y quail           | IgY   | 4         | PMID 20398946 |
| chicken                     | <i>Gallus gallus</i>                 | M chicken         | IgM   | 4         | P01875        |
|                             |                                      | A chicken         | IgA   | 4         | AAB22614.2    |
|                             |                                      | Y chicken         | IgY/G | 4         | S00390        |
| Australian echidna          | <i>Tachyglossus aculeatus</i>        | M echidna         | IgM   | 4         | AAN33013.1    |
|                             |                                      | A echidna         | IgA   | 3         | AAN33012.1    |
|                             |                                      | G echidna         | IgG   | 3         | AAM61760.1    |
|                             |                                      | E echidna         | IgE   | 4         | AAM45140.1    |
| platypus                    | <i>Ornithorhynchus anatinus</i>      | M platypus        | IgM   | 4         | AAO37747.1    |

|                                      |                              |              |       |   |            |
|--------------------------------------|------------------------------|--------------|-------|---|------------|
|                                      |                              | A1 platypus  | IgA1  | 3 | AAL17700.1 |
|                                      |                              | A2 platypus  | IgA2  | 3 | AAL17701.1 |
|                                      |                              | Y platypus   | IgY/O | 4 | ACD31541   |
|                                      |                              | G1 platypus  | IgG1  | 3 | AAL17703.1 |
|                                      |                              | G2 platypus  | IgG2  | 3 | AAL17704.1 |
|                                      |                              | E platypus   | IgE   | 4 | AAL17702.1 |
| <b>gray short-tailed<br/>opossum</b> | <i>Monodelphus domestica</i> | M opossum    | IgM   | 4 | AAD24482.1 |
|                                      |                              | A opossum    | IgA   | 3 | AAC48835.1 |
|                                      |                              | G opossum    | IgG   | 3 | AAC79675.1 |
|                                      |                              | E opossum    | IgE   | 4 | AAC79674.1 |
| <b>brush-tail opossum</b>            | <i>Trichosurus vulpecula</i> | E brush-tail | IgE   | 4 | AAF80357.1 |
| <b>mouse</b>                         | <i>Mus musculus</i>          | M mouse      | IgM   | 4 | AAB59651.1 |
|                                      |                              | A mouse      | IgA   | 3 | AAB59662.1 |
|                                      |                              | G mouse      | IgG   | 3 | AAB59656   |
| <b>human</b>                         | <i>Homo sapiens</i>          | M human      | IgM   | 4 | CAA33070   |
|                                      |                              | A1 human     | IgA   | 3 | AAC82528.1 |
|                                      |                              | G1 human     | IgG1  | 3 | AAC82527.1 |

**Supplemental Table 4. Comparative Ig C regions used for phylogenetic analysis of the relationship between IgX and IgA.** Pheasant, turkey and quail sequences were described in Choi *et al.* (*Veterinary Immunology and Immunopathology* 136: 248-256, 2010) and were kindly supplied by Dr. Jae Yong Han.



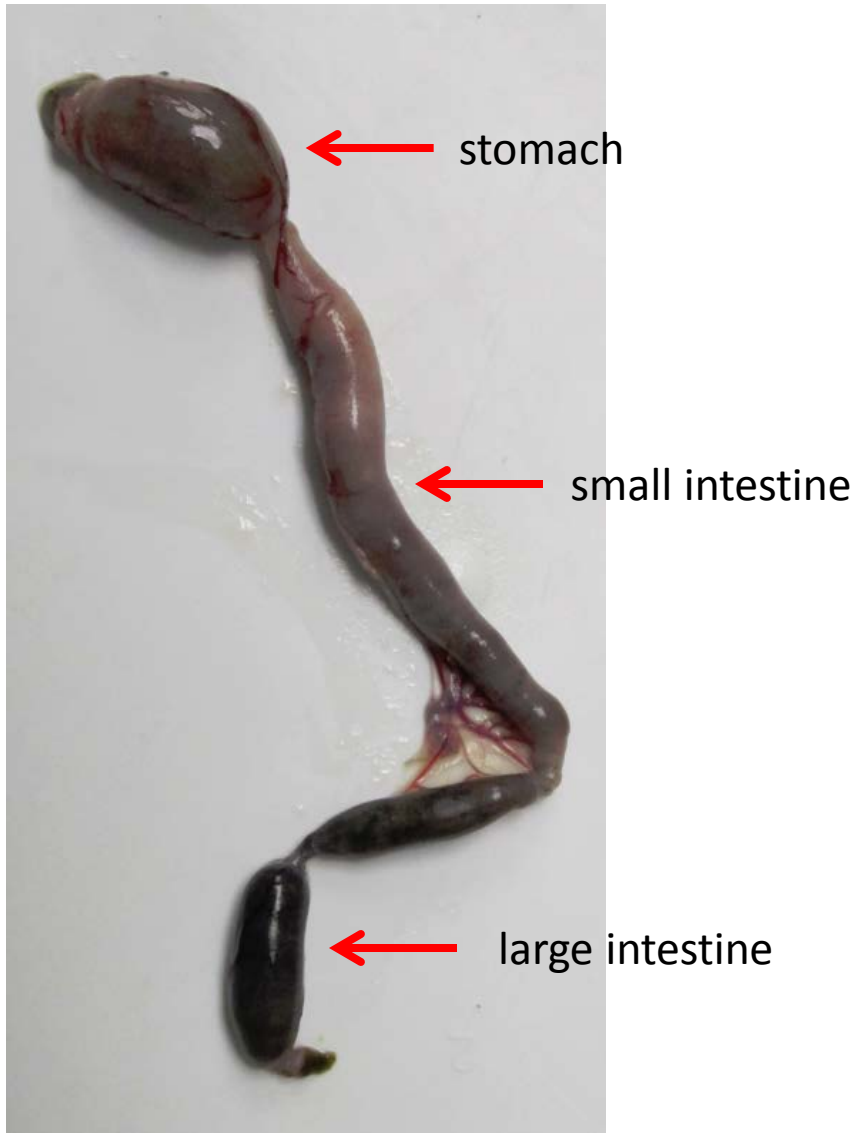

**Supplemental Figure 1. Site of flora sampling from *Xenopus laevis* gastrointestinal tract.** Resected alimentary canal from adult *X. laevis* fed one day before tissue harvest. Red arrows show the three sites where luminal contents were harvested.

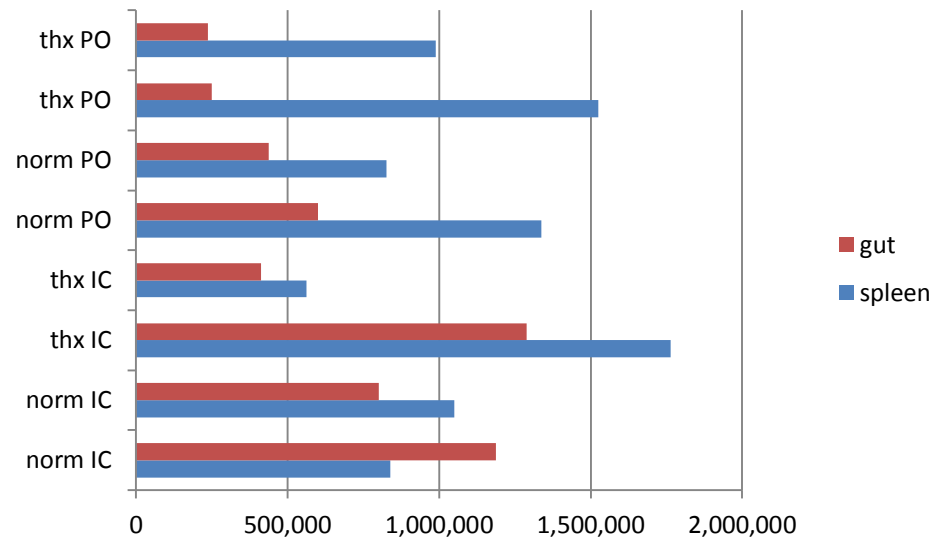

**Supplemental Figure 2. Total cell counts from tissue harvests.** After sacrifice, lymphocytes were isolated from spleen and intestine as described in Methods. Total cells isolated from each immunized frog are shown, identified by surgery status and immunization route.

10 20 30 40 50 60 70 80 90 100  
M newt .....APSVFPLIG---CGASSDPVVGCLAKD-FLPDSATFTWWDKNNSSFTSG-LANFPSIMTN-SFYTASSKVQVTS-ESWKNKDS--YYC  
M axolotl .....APSVYPLIS---CGASLDPVVGCLAKG-FLPDSVTFDWDKNNASFSAG-VAKLPSVTTG-GLYSASTRVKVPSESWKNRDP--YYC  
M frog .....PPSLFPLIS---CGESMDPVTIGCLAKD-FLPETISFTWGDKNNASYSTG-LKSYKPVMQSSGYSASSQVNVASAVWDKMEP--FYC  
M slider .....ASPAAPSLFPLYP-SCGTDTSQDPIALGCLAKD-FLPETIEFNWSDKNPNITDG-VKKFPSVLNTVGTYSATTQLLVPAS--KAQTI--FYC  
M turtle .....APDLFPLFP-SCGFDPSPVVLGCLAKD-FLPDSITFSWRD-KTSNLITNA-MKNYPSTLNTVGTYSTVTQLSLSAS--KAEGI--FYC  
M anole .....APVLFPLIP-IGSGDGEN--IAIGCLAKD-FLPDSITFAWNPKNATIDDSNIKTFPSISDASGTFMASSQTAVSVTDWKARSA--FYC  
M gecko .....TDSNE--ITIGCMAKD-FLPDSLTLVWQKPNNDLEADKIKRFPSINNPTGTFIASSAATVPTSQWDAFKP--FYC  
M duck .....PTLFPLLS-CSSSSSSSSLYAVGCVAVG-HVPAGVTFVSWT-DVTNATVATT--IVNFPEARPGGNWAASRLELPLQEGKGRQP--FYC  
M pheasant .....GSSSPSAPVLYPLVP-CSPSAS---LYTIGCAAFN-FQPNTISFSWFDSSNRSVTAL--DFGSTFSSGRG-YRATSRLQMTQTEGKQKQP--FRC  
M turkey .....GSTSATAPVLFPLVP-CSPSAT---LYTVGCAAFN-FQPNTISFSWADSSNRSVTAL--NFGSVITSGRG-YRATSRLQMTQTEGKERQP--FRC  
M quail .....GSSSPSPRFLFPLVP-CSPSPS---LYAIGCAAFD-FRPSSISFRWTDNDNETLPAS--DFNPIQAPDMT-YKAVSSFRMTQTEGKSRQP--FRC  
M chicken .....PRLFPLVL-CSPSDS---VYTVGCAAFD-FQPSSIAFTWFD-SNNSSVSGM--DVIPKVISGPP-YRAVSRIQMNQSEGKQKQP--FRC  
M echidna .....SLNQESSLAVGCLAKN-FLPNSITLWDFKNRTTVGTEKFINYPTVLSGQT-YSTTSQMTISATEVMMGQDDFVFC  
M platypus .....APLLFPLVPSCGDSLQESSLAVGCLAKN-FLPNSITLWDFKNRTTVGTEKFINYPTVLSGQA-YSTTSQMLISATEVMMGQDDYVFC  
M opossum .....APNLFSLSP-CLNSGVQNAVAVGCLAKD-FLPDSINFSWTYQNSAISHTDLKIFPSQMSGPT-YTATSQVILPALDVLQDS--YLVC  
M mouse .....PNVFPLVS-CESPLSDKNLVAMGCLARD-FLPSTISFTWNYQNTEVIQG-IRTFPTLRGKG-YLATSQVLLSPKSILEGSDYLVLC  
M human .....GSASAPTLFPLVS-CENSPSDTSSVAVGCLAQD-FLPDSITFSWKYKNNSDISS--TRGFPSVLRGGK-YAATSQVLLPSKDVMOGTDEHVVC  
X axolotl .....APTFFPLIPCCVDRGS-TSPLTLGCLMSGYLP-EPVNVWTWSTGTV---SSVRTPSSAYNAASGLHMRSSQITVPAGSWITG--KYTC  
X frog .....APSVFPLIPCCDNDVF-NDSVTMGCLVTVGYMA-DPLDIQWNDGSIT---TGIKTMRPVLSDVDGLYTLSSQLTLILASEWKNS--TYKC  
A gecko .....APSVFPLPCCQDP---TSNKTMGCLITG-YFPEPATVQWNSG--A--ITSGIQNFPAVRQSSSGTYTFTSQTLPASSLHSQ--TFQC  
A duck .....PTAYPLVT-TTACED-GSNVTIGCLVDFEF-EPVTVWVSGVTG---DQLTFPAVQN--GASYTVSSQLTVPASSYDQG--NFQC  
A pheasant .....VPESGPTLYPLTPYCSHVEG-DTNVTIGFLVTSFIP-PPVSVTCATVGS----PVETTLPVVT--SGGYSLTTAVTLPLEECHT--ELTC  
A turkey .....VPATGPTLYQLLPVPSDCDN-DANVTIGFLVTSFIP-PPVTVTWTTGGSPAG--PALTSLPVLT--SDGYYSFTTALTLVPEETCS--EFTC  
A quail .....DPASGPTLYPLPPSECS---DNVTIGCLVTSFIP-PPVTISWTITGSSLDPTSATTSLPVQT--SGGTYSQTTALVVPMEEVKEG--RFTC  
A chicken .....PTLYQLLPLPSDCP--DPNVTIGCLVTSFLP-PPVTVTWTTGGAADA--TAVTSLPVAT--TGGTYSLTTALTVPREQLQGN--EFVC  
A echidna .....ATKTTPTVFPLSAYQSNSE--DPVSIIGCLVTVGYFP-EPVEVTWN-NQNKDG--STARTFPAVL-ESSGYVLSLLVLPADQCPES--KAYQ  
A1 platypus .....FPLETCSSENQ--DPVVACLKVGIFP-MPGVVYWDSDQAS---SFTRTYNSIQ-STGGSFVFSVQLTMLSSQCPLE--KEFH  
A2 platypus .....APTIFPLNAYGSNSE--EQVSIIGCLVTVGYFP-EPVEVTWV-NQAS---SAVRTYPAVL-ESNGYVLSLMLTLPANQCPDD--KTYQ  
A opossum .....SPTVFPMSLCDSRTG--DSVALGCLAQGFPP-EPVTLVSWNYNGSE---GTVRSYPAML--SGNTYLQTSVLDLTPANQCP--EAYK  
A mouse .....PTIYPLTLPPVLCVCS--DPVLIIGCLVTVGYFPFPTMNVTVGKSGKD---ITTVNFPPAL-ASGGRYTMSQLTLPAVECPPEG--ESVK  
A1 human .....SPKVFPPLSLCSTQPD--GNVVIACLVQGFPPQEPVSVTWSESGQG---VTARNFPPSQDASGDLYTTSSQLTLTPATQCLAG--KSVT  
Y newt .....SKPSVYPLVSCCG-AES-STNVDIGCLATG-YLPEPVTAWDQN-GS--ITSGIRTFPAVRHKSSHYSLSSVLSVSSADWTKT--TYKC  
Y axolotl .....KPSVFPPLVPCCG-STP-DTNVSIIGCLVTVGYFP-EPVVEVSWKAG-ST--TMPGGKTFPAAQQOAT-ALSTSSQIRIPAYEWGTN--SYSC  
Y frog .....APSVFPLRPCCGSSSS-DSHVTIGCLSTG-FLPAPVDVWVNS--GS--ITSGIKNFPAVLQQSG-LFASSSQLTIPLSDWKAKK-SFEC  
F frog .....APSVFPLKPC---SSS-NEIATIGCFASG-FLPQPVNIQWKSSSSGS--ITSGIKNFPAVAQQSG-YFASSSQLTIPIISRWNSE--SFTC  
Y turtle .....APSVFPLTSCPGIAT--TSQVTFGCLVKG-YFPEPVTVQWTP-----NTSGVKDYPVSLQVTSGLYSLSSQVTVSDSSWEDN--TYHC  
Y anole .....TFLAVTSATPTAPAVFPLTPCCQDLA-ASEVRLGCLVTVGYFP-EPVTVQWNSG--A--ISTGIRTFPAVLQSSSGHYTLSSQLTVPVSSWNTI--NFQC  
Y gecko .....APAVFPLSPCCEDTSS-ASQVTMGCLISG-YFPEPATVQWNSG--A--LSSGIQNFPSLLQSSSGHYIFSSQLTVPVSSWQSQ--NFEC  
Y duck .....APSVFPISSCCGSTQ--Q-QPVVGLATG-YIGPVVTFVSW-----GASGATSVTVPEETHGVGPHKRASFLRPPHAGAGD--FFTC  
Y pheasant .....ARPTSSPQLYPLSACCS-DSS--L-PAAVGCLVSPSSSSSSSVWEGV-----GGSDMAAIVS-----GSPKRLSFVRLTAGEKRK--SFVC  
Y turkey .....AGPTGSPQLYPLSACCSGSS--L-PPAVGCLVSP-SVPSAVTWDTG-----GSSEVSWFGS-----GSSKLSFVRLTAGEKRM--SFVC  
Y quail .....ARPQLFPLSACCSSS-----PISLIGCLVSP-SVPSSITWVSGP-----RGSEPGSAIL-----DPQRKLGFIRLRDGDKGE--KFEC  
Y chicken .....ASPTSPRRLYPLSACCSDSA--V-PPAVGCLLSP-SSAGGISWEGS-----GGTAVAGRVS-----GTPVKLSFVRLSPGEKRK--SFVC  
Y/O platypus .....APSVFPLTPSCEEVE--LSEVTLGCLVTVGYFP-EPVVDVWVSWPS--F--YNSKAQTYPSILHP-TGLYSLSSKITVPAYNWHNK--VYTC



Y newt LVKHEPTNTNTDKTVSS-AVC-----KTATSKPAVQVLQSSCDDL DGN SIELICLVSGYSPDKIKVQWLRNGETT---FLPAYTSPSIIKGRE  
 Y axolotl SVKHKPTSTETIHKTTITS-AEC-----KKATSKPSVQVLQSSCADTDGN SIELVCLISGYTPDNIQVRWL VNDKMA---PIQGQTSPPQKDGQ  
 Y frog NVEHKPTSTKVTQKIECQDEP-----EPEPIKPTVEILQGPCASSE--SVELLCLITGYAPSEIKVQWLLNGQVT---EISPSNSKPCKEEN  
 F frog TVTHGSTSTPVTSELKG-----TSCNR--  
 Y turtle TVKHEPTSSSITKEIP-----KSSTPQPPTVQVYHSS-CKLTPG-TIDLLCHVSGFYPTPVTVEWLVDGESG---VLHGETAPATRDAGG  
 Y anole KVIHAPTSSTIEQRIERC-----VTHSPVAPDVRLHSSCSPRSTDASIELVCLISNFYPKEVSVEWLIGGKSG---LLPSYTEPPRQDAVG  
 Y gecko NVEHASTNTTISKEIEAC-----LMHEPVTPEVLLLHSSCNRTDNATIQLVCLISGFYPRTVKVNWL VNRQLA---ILPAHTENPRKDATG  
 Y duck SVNHQATRTSLTQNV EGCVA-----GGEP-TPPEVQVLHSSVCSLGLDSSVELL CVITGFSPPPVEVEWLV DGA PA---HLVATMTRPQREAGS  
 Y pheasant SVKDQRSGGVIRKEVQVCRV-----PPTPYSAP EVQVLHASSCTASSGDSVELLCLVTGFSPAQIELEWLV DGMRG---LVVASNTPVVREG--  
 Y turkey SVRDP RSGGAVRKEVQVCRV-----SPTPPSAP EVQVLHGSSCAASRGGSVELLCLVTGFSPAQIELEWLV DGI RG---LLVASDSPVVREG--  
 Y quail RVTAPPSGEVLRKEVPA CLG-----SSLTPLAPEVQVLHSSSSCSPSNRETVELICLVTFGFSPPELQIDWLDIGRKAGP-TFPAIRGPMVREEGE  
 Y chicken SAAP--GGALLKKEVQVCRV-----DPVPPVAP EVQVLHASSCTPSQSEVELLCLVTGFSPASAEVEWLV DGVGG---LLVASQSPAVRSG--  
 Y/O platypus KVTHPTNTIISGNV VAPAPPTPQTTTPVVT PAMKSPPAVRVHSSCLPNGDAEATIQLLCLISDFSPAKIEVKWLEDDEEQ---DGFY--VSESKRENN  
 E platypus NVEQMATKTKINTEVYSDCS-----KDP--IPPTVKLLHSSCDPRGDSQASIELLCLITGYSPAGIQVDWLVDGQKA---ENLFPYTAPPKREGN  
 E echidna NVEQTAIKTKINTEVYSDCS-----REP--IPPTVKLFHSSCDPRGDSQATI ELLCVITGYSPAGILVDWLVDGQKA---ENLFPYTAPPKREGN  
 E opossum SVDHLPTSTKIKKTL SLPEC-----GPVTIIPPTVKLFHSSCDPRGDAHSTIQLLCLVSGFSPA KVHV TWLV DQEA---ENLFPYTTRPKREGG  
 E brushtail SVDHLPTSTKIEKHVSTGPT-----KNGPVI PPTVKLFHSSCDPRGDAHSTIQLLCLVSGFSPARVKVTWLV DQEA---ENLFPYTTRPKREGS  
 G echidna NVEHPASKTKIARKVE-----  
 G1 platypus NVEHPASKTKIDKKVE-----  
 G2 platypus SVEHPATQKNTQKTVG-----  
 G opossum NVAHPATSTKIDKKIEATTTT-----  
 G mouse NVAHPASSTKV DKKIVPRDCG-----  
 G human NVNHKPSNTKVDKKVEPKSCDK-----  
 T zebrafish TADHPSKTVNETFSTAP-----TLSLVLVPT EKNTFAMCVIEDFYTENITVRWK ENNIYK-----QSQTNLEYKLN M  
 T trout SVDHPGGAKTAVINKPVP-----KSRTVSLLSAPIGTTQYLMCMIEDFTSETVKVTWKKND-----MEVEAQTPTLGKRPS

210 220 230 240 250 260 270 280 290 300

M newt -NFDVTSWLDVTPGEWNKNSLYSCVVDHEASKFWITKNISKSLSCDDSTTAP-ATIAVFTVPPTFFQD-IFESKSAKLT CIVTNMASAENLN---ITWSRE  
 M axolotl -NFDVTSLLNIEPMDWNMDTVYSCVVDQ TASKFWNTRNMSKSM L CD-AQVGP-VKVTAF TVAPT FED-MFESKSANVTCIVTNMGTIEGFN---ITWSRE  
 M frog -VYETTSYLSITRKEWDLDTLYSCVVEHAESGSLQEK NMSKSLMCD-TPITP-TSIQVITIPPSLES-IFEKKSATLTCLVSNMANS EDLRS--ISWYKK  
 M slider ----LISRLTVS ERDWEAGRVYSCKVESK--NFSDMRNTSKSFECGLIDDCS-PEIDALLIXPNFAD-IYIRKSAILT CRVINMQST EGL---NVIWTK E  
 M turtle ----FHSHLTVTEKEWDDGGHKYS CRVEGK--NFSDSRNTSKVFECGEID-CP-QGITVQLIPPTFAD-IYIRKSATLT CRVGNMQST EGL---NVTWSKK  
 M anole -CYNMRSKLIVTKEDWLSGVKIFYCEVQNF--KYNNTLVISLYDVCPDSDGPGNGDDIRVETIAPTYAD-IYQTSSAKLT CRISNIPYGOELTEL NVTWTQE  
 M gecko --FSIISELTVTKKDWYADTEFSCQVQNE--KFNEIRNVSKVSVCEGGGECN-VRIRVETIPPSFND-IYLTKSATLT CRISNIPFGEDL-ALNVTWTRA  
 M duck -AYVTD SWLSVTEAEWDAGTVYTCQADG-----EMRNSSKSLECGLDKPDSD-SDIAVRVLPSPFVD-IFNEKVAKLTCKVSNLPTVEGL---VISWLKE  
 M pheasant -ETVAESRVGVTESEWEAGVTFSCLV D G-----EMRNTSKRMECGLEPLDP-VDITVRVIPPSFVD-IFTTKSATLT CRVSNM ANVEGL---EVSWWKE  
 M turkey -ETVAESRVEVTEGEWDSGVVIFSCLV D G-----EMRNTSKRMECGLDPIAQ-PDITVLAIPPSFVD-IFASKSARLT CRVSNMGNVESL---EVSWWKE  
 M quail -QTVTQSKVEVTESEWDSGVVIFSCLV D G-----EMRNTSKRMECGLDTPDP-AEISVRVFPSPFVD-IFLSKTAKLKRVSNM ANVDGL---EVSWWKE  
 M chicken -EVVAESRIVTESEWDTGATFSCVVEG-----EMRNTSKRMECGLEPVVQ-QDIAIRVITPSPFVD-IFISKSATLT CRVSNM ANVDGL---EVSWWKE  
 M echidna -AYQLSSSLTVSDTDWFKATDFTCVVEHP--NTHFIEMRNASYKCGGGQSGS---IKVSTTPPSFAS-IFTTKSAKLECLVTGMSTSDSL---SIVWVQY  
 M platypus -TYQLSSSLTVSDTDWFKATDFTCVVEHP--KTHFIEMRNASYKAGVPSSS---IKISTTPPSFAG-IFTTKSAKLVCSVTGMSTSDSL---SIVWTQY  
 M opossum -TYFLQSSSLTINESDWLSQSTFTCRVDHL--NAQF--QKNVSSSCAISTDSP---IEAFAIPPSFAS-IFVTKSAKLT CVVTNLPTYDSL---SISWTRK  
 M mouse QTYKVISTLTISEIDWLN LN VYTCRVDHR--GLTF--LKNVSSTCAASPST D---ILTFTIPPSFAD-IFLSKSANLTCLVSNLATYETL---NISWASQ  
 M human TTYKVTSTLTIKESDWLGQSMFTCRVDHR--GLTF--QQNASSMCVPDQDTA---IRVFAIPPSFAS-IFLTKSTKLTCLVTDLTTYDSV---TISWTRQ  
 X axolotl GLFSATSRLSVLQGEWNQGTLYSCDVTHAATNASIMANISKCAEPCSL S-----IAVSLPPPFEELYLTHSGHLTCLATNIKTTQS---FEIVWTRD

X frog GTYSSSSQLRILKGMWNKGTQYSCIVTHTSSNNTTTIANISQCTEQCHDN-----LQVYPLTPTFHD-LYFSRNAKVTCLVSSMKTIEN--FDISWERE  
A gecko DTFSTTSTANITQLEWKEGKTYTCQVIHQG--STVERNATKCRGCG-----NAVHVETIIPPSFAD-IFLTKSAKLTCRISNIPDEQDLEELNVTWIRA  
A duck KKATQWSRVNVSRQSWDQGAEFSCRVSHTSLKEPIVESISTYCTSGAP-----KLEVTLLPPSLED-LYISQNASVTCVATN--APQD--LKFSWSRS  
A pheasant GGVKQWSRVNVSRQSWDQGAEFSCRVSHTSLKEPIVESISTYCTSGAP-----KLEVTLLPPSLED-LYISQNASVTCVATN--APQD--LKFSWSRS  
A turkey EGVKQWSRVNVSRQSWDQGAEFSCRVSHTSLKEPIVESISTYCTSGAP-----KLEVTLLPPSLED-LYISQNASVTCVATN--APQD--LKFSWSRS  
A quail GCVSQWSRVNVSRQSWDQGAEFSCRVSHTSLKEPIVESISTYCTSGAP-----KLEVTLLPPSLED-LYISQNASVTCVATN--APQD--LKFSWSRS  
A chicken SGVTQWSRVNVSRQSWDQGAEFSCRVSHTSLKEPIVESISTYCTSGAP-----KLEVTLLPPSLED-LYISQNASVTCVATN--APQD--LKFSWSRS  
A echidna -----KNPG-VCPPDCPT-----VSVSLLPPSLDS-LFLDKGANLTCELTGVANVQG--ANFSWSAP  
A1 platypus -----VPQCKCSP-----KVLHPPSLEG-LFLGKGANLTCVLKGLVDPRE--TTFTWTRP  
A2 platypus -----SNGCECCSNCP-----VSVSLHPPSLES-LFLDKGANLTCELTGVSINVKG--VNFWS-P  
A opossum -----PR--PCDCPS-----GVHVSLSGSPLES-LLLIGIGANLTCGLSGLKNSNG--ATFTWVHD  
A mouse -----PPP--PITIPS-----CQPSLSLQRPALD-LLLGSASITCTLNGLRNPEG--AAFTWEPS  
A1 human -----TPPTPSPSTPPTPSPSC-CHPRLSLHRPALED-LLLGSANLTCGLTGLRDSAG--VTFTWTPS  
Y newt GTFSTTSQVNIKSDWILGERYTCVKDHPATNTSLHDSIRNCPESP---SG-VQLKVSIMPPKAKD-LYVTKQPSIVCQVTKMESADG----LSITWK  
Y axolotl GTFSTTSQVNIKSDWILGERYTCVKDHPATNTSLHDSIRNCPESP---SG-VQLKVSIMPPKAKD-LYVTKQPSIVCQVTKMESADG----LSITWK  
Y frog DTFSSRSKVSVPKEDWNSGDSYTCVKVHPASHTKTEASTKKCDD-----TA-ITPKVDVLPSPKD-LLVTKKAVYCVISRMTSTDD-----LTVQWS  
F frog -----TPKTSIMP-----  
Y turtle RTFSTHSNASVSQEDFMQDKMYTCRVSHPGTGTEEDYARKCKDVP--TTT-SSILVFTVPPSPEE-LYVGQSPKVTCLVNLPNDA--DLRVVWSRE  
Y anole YTFSTTSSANISQADWLEGTIYTCVKVHAGSQTMRARAKCEDDS-T-SQC-DGIYVYLKSPPTND-LYLNRPDKVSCVVGNGLESE--EGLKVSWSRD  
Y gecko DTFSTTSTANVTQIDWKEGKTYTCQVIHQG--HKVEKHATKCRGDSGN-CTA-NGIKVSIPLPPTAD-LYMNGEPRILICVVTGLESN--VGMKVRWSKE  
Y duck KTYMATSQTNVSRREDWKEGKTYTCQVIHQG--HKVEKHATKCRGDSGN-CTA-NGIKVSIPLPPTAD-LYMNGEPRILICVVTGLESN--VGMKVRWSKE  
Y pheasant STYSFSSRLNVSKDDWKEGKTYTCQVIHQG--HKVEKHATKCRGDSGN-CTA-NGIKVSIPLPPTAD-LYMNGEPRILICVVTGLESN--VGMKVRWSKE  
Y turkey STYSFSSRLNVSKDDWKEGKTYTCQVIHQG--HKVEKHATKCRGDSGN-CTA-NGIKVSIPLPPTAD-LYMNGEPRILICVVTGLESN--VGMKVRWSKE  
Y quail STYSVTSRVNVSKDWSGKSFYTCVKVHPGTGVSVEDHVRGCEGST---QTC-GPIQVFLPSPGD-LYIGLDAKIRCLVYNLPSKA---SLSITWSRD  
Y chicken STYSLSSRVNVSGTDWREGKSYSRVRHPATNTVVEDHVKGCPDGA---QSC-SPIQLYAIPSPGE-LYISLDAKLRCLVYNLPSDS---SLSVTWTRE  
Y/O platypus GKFSAYSSEFNITQGEWLTGKTFTCSVRHMASKKDIQDYARCKDI---NLI-QNLKVSVSPNPTD-LFIARTPSLTCLVASLP-DSEGIIK--LQWIHK  
E platypus RSFSSHSEVNITQDQWLSGKTFTCQVTHLADKKTYQDSARKCADS---DPR-G-ITVFLTPPSPTD-LYISKTPKLTCLIIDLV-STEGME--VTWSRE  
E echidna RSFSSHSEVNITQEQWLTGQFTFCQVTHLTDHKTYQDSARKCADS---DPR-G-INVFLTPPSPRD-LYLSKSPKLSCLVVDLV-NTNGLE--VTWSRE  
E opossum QTFSLQSEVNITQGWSSNTYTCVVKHNG--SIFEDSAQKCSDT---DPR-G-ISAYILPPTQD-LFVKKVPTIGCLIVDLA-SAENVK--VTWSRE  
E brushtail QTFSLQSELNITQGWTSLKTYTCQVTHNG--SIYRDNAQKCSDT---DPR-G-ISAYLSPSAFD-LYVSKAPVLTCLVVDLA-SAENVK--VSWTRE  
G echidna -----HGP-IPPCP-----SPG-G-PAVFIFPPKPKDFLSVGTGPKVTCVVVDLGFEDKDEPNVVTWYQG  
G1 platypus -----PGPSNPPHCP-----NPG-S-AAVFIFPPKPKDFLSVAGTTPKVTCLVVDLGFEDKDEPNVVTWYQG  
G2 platypus -----PRFPGSNSCP-----VLC-G-PAVFLVPPRPKDLLSEGGKPKIICVATGLRDEEKDAR--VKWYKN  
G opossum -----CPCCKCNTV-----DAG-G-PSVVFVPPNPQDVLKLSRSPKVTCLVVDLGFEDKDEPNVVTWYQG  
G mouse -----CKPC-ICTVP-----EVS---SVFIFPPKPKDVLTTITLTPKVTCLVVDLGFEDKDEPNVVTWYQG  
G human -----THTCPPCPAP-----ELL-GGSPVFLFPPKPKDTLMISRTPEVTCVVVDVSHEDPEVK--FNWYVD  
T zebrafish NGLHTALSLEYKLEIVIPNTEYTCVESHG-----KTFHKTQNF-----AKFRLMLKPPMVRE-MFINNRIVLQAVVSGDLSTAVK-----EAS  
T trout GLYSGSSLLKVINSDWNNKVKYSCVVEHQG--ETISKTTSKTEP-----LTVTLNPPRVRE-VFLDNQAVLECVITATDQNTVS--GTNITWH

310 320 330 340 350 360 370 380 390 400

M newt D-TKEV-LKTEMSVPIIHNNGTYSAGK--TATVCADQWAAGHKFACKVLHQ-DLAGPSTAYLQKKNGNPPKPTIVVYPPPTSEELALKE--SVTLTCLVE  
M axolotl D-TNEV-LKTEITNPIFHDNATLSVMG--IATVCADQWDAHFKFVCKVLHQ-DLAEQRVLSLQKPNGNQRRKPSVYIYPPPSSEELALKE--TATIVCLMR  
M frog SGTQEIPLKTELGDIAISDNRTYSVKG--TTTVCADWNN-DKFVCKVEHT-ELASMKEVFLFKEKG-EYNTPSVYVFPPLLEELSKRE--TATLTLVK  
M slider DG-SELKTSVGD-PKVQSNR-RFSVDA--TTSVCADEWERGDKYTCKVAHP-ERIFPLKKTTLTKEPVTNSHAPSIVYIFPPPSSEQLALRE--AATVTCLVK  
M turtle DG-KPLKTTLGD-RKVQNG-RFTVDA--TTSVCADEWERGDEYTCIVSHP-DLIFPIKNTFRKQPVTDSPRAVYVFPPLLEELALRE--AATVTCLVK

M anole PGHKILNTEYQK-PTDQNG-MQYIDA--TATVCATEWRSQTFSCVKVFPALPKPVEKKLRKTIISGIPHTPSVYVLPSPSDQLTLRE--SATLTLCLVK  
M gecko SDKKTLETTTQ-AKEQENRELVFVDA--TATICAEEWEKGDYTTCTVKHR-LLATTEVKSLLKQNGGSHSAPAVYVLPSPSEQLALQE--TATPTCLIK  
M duck DG-QKLETKTMP-RVLQNS-LYGVVEG--VASVCADEWNRKEEYVTKVSH-ELLFPVEEKLQKTEARDAKPPALYVFPSPPEQLNAHE--TATVTLAK  
M pheasant SG-AKLETAVGQ-RVLQNSG-LYTVEA--VASVCADEWDRGEDYVCKVNH-ELLFPVEERLRKMEARNAPPPKVYVFPSPPEQLNNRQ--SVSVTCMAQ  
M turkey TG-GKLETAVGQ-RVLQNSG-FYMVEA--VASVCADEWDRGEDYVCKVNH-ELLFPVEERLRKMEARNAPPPKVYVFPSPPEQLNDRQ--SFRVPCMVQ  
M quail KG-GRMETSQVQ-KVLQNSG-FYMVEA--TTSVCVDEWDGDAYVCRVNH-ELLFPVEERMKKT EARNARPPSISYPPSPDQPGQLQ--RLSITCMIQ  
M chicken KG-GKLETALGK-RVLQNSG-LYTVDG--VATVCASEWDGDDGYVCKVNH-DLLFPMEEMRKT KASNARPPSVYVFPSPPEQLNGNQ--RLSVTCMAQ  
M echidna DG-KELATKTTV-SKIOPDG-TFSAKG--EASVCAEDWQSGKRFTCTVSHA-DLPAPQSSHISKQKEVNLHSPSVYIFPPASDQLSLRE--SVTLSCLVK  
M platypus EG-KELTTKTSV-SKIOPDG-TFSATG--EASVCAEDWQSGKRFTCTVSHA-DLPAPQSAISKQKEVNLHSPAVYVLPSPASDQLSLRE--SATLSCLVK  
M opossum DG-QLLKTQKV-FSSHPNG-TFTAEG--EATVCAEENWNGEAFKCIVTHS-DHPVPLKKEIFKQEVLDHAPSVYLLRPNPEELSLRE--SATVTCMMK  
M mouse SG-EPLETKIKI-MESHNG-TFSAKG--VASVCEWNNRKEFVCTVTHR-DLPSPQKFIKPNVHKHPPAVYLLPPAREQLNLRE--SATVTLVK  
M human NG-EAVKTHNI-SESHNA-TFSAVG--EASICEDDWNNGERFTCTVHT-DLPSPKQTI SRPKGVALHRPDVYLLPPAREQLNLRE--SATITCLVT  
X axolotl TAGPL--NVVTDPPQLNDNGTYSVTS--RLAVCAEEWISGEKFTCTVKHQ-DLPSPVKVDIMKRKDG SARAPQVYLLPPSPPEELALQE--MVTFLCYIK  
X frog KAGNL--EFVTEDPVLDHNGTYSVAS--ILSVCAEDWESGDKFSCVRSQ-DLPSPVKTIFKQNEGTPKAPDVYLLPPSAQELIQQE--MVTLTCFVT  
A gecko SDNKELETVIGQPKQENSELLFVEA--TATVCKEEDWSDGTFKCKVTL-LLPTAVIKTLKLVHGGTPRAPAVYVLPSPSEQLALQE--ETATLTLCLK  
A duck EG-TA-LDVVTGEPQKQENGLYRLTS--VLKICAEENWNGESFTCGVAGP-EIQGSVTKSVQKDLAVSVQAPSVYVFPSPAEEELARQE--TATLTLCLAS  
A pheasant SG-AG-LD-VSQTEDRQADGRYTVRS--FLRVCVEEWNGGEEFEC-AVG-EEGEEVKSIRKDLDSPLHAPSVYIFPPPAEELSLQE--TATLTCMAT  
A turkey SG-AG-LTSVRRRTDRRTGVTSPGAPRSIVLRVCVEEWNGGETFEC-AVG-D-GDEVKKSIRKDLDSPLHAPSVYVFPSPAEEELSLQE--TATLTLCLAT  
A quail NNQMG-LD-VGRNEELQANGLYRVVG--TLRVCVEDWNGGESFGC-TVSY-G-EEQVKSIRKDLDSVPRPPSVYVFPSPAEEELALQE--TATLTCMAT  
A chicken SG-GG-LD-VSQTEDRQADGRYTVRS--FLRVCVEEWNGGETFEC-SVRE-EGVVAAEESIRKETDTPLHAPSVYVFPSPAEEELSLQE--TATLTCMAS  
A echidna NSVTA--KPVRRGPAVRDQGGKYTITS--TLEVCTDEWNRQGHFSCTVTH-ELREPITQTIATKSGPLIR-PAVHLLPPTTEELALNE--MATLTLCLR  
A1 platypus NDGDS--QATTGNPVEEEDGTYSLAS--VLEICAEWEHQDKFTCTVTHP-KMS-PITQTIKTPPGPLNR-PEVHLLAPSTEEELALNE--MATLTLCLR  
A2 platypus LSGTA--RPVDGPAVKDDKGYTITS--TLEVCTDEWNRGDKYCTVSH-ELPKPVTKITKVSGLFR-PEVHLLAPSTEEELALNE--LTLTLCLR  
A opossum TAQASTLRPIQGAPEQDSNGKYRVSS--VLEICTEEWLRGDTFSCVSHS-EIET-TTKTIYKPKVPQIP-PQIYLLAPSADEQALNE--MVSITCLR  
A mouse TGKD--AVQKKAQNSCGCYSVSS--VLPGCAERWNSGASFKCTVTHP-ESGT-LTGTIKAVTVNTFP-PQVHLLPPSPPEELALNE--LLSLTLCLR  
A1 human SGKS--AVQPPERDLGCYSVSS--VLPGCAEPWNGKTFCTAAYP-ESKTPLTATLSK-SGNTFR-PEVHLLPPSPPEELALNE--LVTLTLCLR  
Y newt QEDGSPLVGLPHETEVLDPDGLGADS--TLTITTDWAKQGSASFCKVEHP-DLSSPVTRTIRKPK-REIGPSMYLFPHPHQLDQH--ELVSLTLCLR  
Y axolotl RREGPEEAAVISIQYIDSDGTFAM--YLNITKNEWERGDEFTCKVKHF-DLPFPLSRSVSKPTG-RSFAPTMVYFAPHHEMELANY--DFVSLTLCLR  
Y frog RSDGKKALAFDSAPEKAYDGTFTVKS--TLKISPGDWENKQFNCKVHP-DLPSPIEKSIQKSQD-PGTEPTITLPPSDDELNRD--FISLICMLK  
F frog -----GNNTN-----TKPSIFLYSPRTKELEKDASSLISIIICLVK  
Y turtle K-TGPLSPEPLTLTEQHNR-TFTASS--SLPIFTRDWEDEKYSCKVEHS-ELPTPIIKSISKKQG-KMSPPSVYLLRPHDELSSNG-DSVSLTLCLR  
Y anole KKA-SLDPKPMVSVEELNG-TYTVVS--ALPILTREWDS EETFTCTVEYP-GVPTPIVKKITKLG-KVTTPSVYLFRRPHREELIFQSHS QLTLTLCLR  
Y gecko KPG-TLNP EPLEPAQSDG-TFTLKS--PLIISKQDWLAGIYTTCTLEHS-SGIAPYSKTI AKKTG-KRTQAQVYLFRRPHNEELKSR-DPNVSITCLVQ  
Y duck K-SGALRDPMLVTEHFNG-TFTASS--SLAISTQDWLAGERFTCTVQHE-DLPVPLGKSI AKHAG-KVTAPYIFTFPPHAEELSLA--EVTLTLCLR  
Y pheasant K-SGIFLDPDRFFQEHFNG-TYSASS--SVPISTQDWLAGESFTCTVQHE-ELPLPLTRS VYRHPG-PSPALLISFPFPPHPEELSQS--PLILGCLAR  
Y turkey K-SGALRDPMLVQEHFNG-TYSASS--AVPISTQDWLAGERFTCTVQHE-ELPLPLSRSVYRHTG-PSTAPQIFFPFPHPEELSQS--RVTLGCLVR  
Y quail KQHGHRLPDLILQEHYNG-TYSASS--SVPISTQDWLAGERFSCVQHD-ELPQPVVKG ICKETG-PSTPHIYPLPNPEELSLP--YVTLTLCLR  
Y chicken K-SGNLRDPMLVQEHFNG-TYSASS--AVPVSTQDWLSGERFTCTVQHE-ELPLPLSKSVYRNTG-PSTPHIYPLPNPEELSLP--RVTLSCVLR  
Y/O platypus -GIERPA--SPIKIMQPDGTFSAES--TLSITLPEWMEGESFTCKVQHP-DSPSIVEKAI SKPLG-KSLAPVYVFPSPHMEDELAKQD--TLSLTCLAK  
E platypus SGTPLSA--ESFEEQKQFNGTMSFIS--TVPVNIQWNEGESYTCRVAHP-DLPSPVIEKAI SKPLG-KRLAPEVYAFPPHQAELVSHGD--SVSLTLCLR  
E echidna SGTPLSS--ESFEEQKHFNGTMSFIS--TVPVNIQWNEGESYTCRVAHP-DLPAPVVRTVTKSPG-KRLAPEVYALSPPQEEVDLGG--SVSLTLCLR  
E opossum SGGPVNP--SSLVVEQYNGTFTVTS--HLPVNTDDWIEGDTYTCRLESP-DMPVPLIRTISKAPG-KRLAPEVYMLPPSPPEET--GT--TRTVTLCLR  
E brushtail SGGTVSP--SSPVVKEQYNGTFTVTS--TLPVQTDDWIEGETYTCRLEHP-DLPFPLIRTISKAPG-KRIAPEVYMFPPS EEEK--GN--TVSLTLCLR  
G echidna DKELPKSGSVEPPPKEQRNGTYRFVS--EREVSSKDWLDQKVFCKVQHK-NFPSPVIKTI SHTAG-TRKAP EAYVYSPHRDELN-KD--TFRPSCMIL  
G1 platypus DKELPKTRMLEPPPKEQRNGTYRFVS--ERDVSSKDWLDQKVFCKVQHK-NFPSPITKTI SHTAG-TRKAP EAYVYFPPHRDEMKN--SVSITCLVL  
G2 platypus GTLFPNSQNAQTSSDTIWNGT-RVSS--KLSVTPEDWKS DAEFRCEVEHK-LFPTSLKKAISHDKNTERKTEAYIFSPHTEELS-KE--SVSITCLVK

G opossum EEEVSSP--KLT-QKKLNNGTFQVVS--NLPVVHQEWLKGTSYTCKVNTS-ELPVVERKTISHTKG-ERKKPDIYVFGPHPELQKQD--DVSITCLVT  
 G mouse DVEVHTA--QTQPREEQFNSTFRSVS---ELPIMHQDWLNGKEFKCRVNSA-AFPAPIEKTISKTKG-RPKAPQVYTIPPPKEQMA-KD--KVSLTCMIT  
 G human GVEVHNA--KTKPREEQYNSTYRVVS---VLTVLHQDWLNGKEYKCKVSNK-ALPAPIEKTISKAKG-QPREPQVYTLPPSRDELTKN--QVSLTCLVK  
 T zebrafish VSCKMDNVPINSVSQENESQHVKIYN---VPVDTTKWFNGGKVTCTTRDT-LNNKDIKQEIYFNKG-DGQEPSVKMYKP--DDISTKQ---ISYVCEVS  
 T trout VNGKKQTDHIDLKPIESKGNLNSRVS---TLTIDQTKWTVNKNVQCSAMKS-GEDTPVIQDISFTKGSSEAPSVSVHILP--EEDTKKDG--DVTLVCLVV

410 420 430 440 450 460 470 480 490 500

M newt GYNPCDVFKWLVSQTDPGLEEVNTKPVEEVG---ATGSSS--CFLYSKLKVPESEWSQ-GTVYTCVVGHEALSLQVLQKSID-----  
 M axolotl GYHPCDLFVRWLENSQQLQKQDYVNTKQAEVDP---TTGQKS--CFMYSMLKIPAAQWTA-GNTYTCVVGHEALPLQITQKSID-----  
 M frog GFSPSEIFVKWLHKNEAVPKQNYINTSINDELL---PKGQKSGKFFLYSLHTIDIKWDA-GDSFSCVVGHEALPLQLTQRSID-----  
 M slider GFNPPDLFIKWLSNGEELNASEYINTKPILE-----SSQPPLYFAYSMLNINEQEWNA-GNTYTCVVGHEALPLQVTQRTVD-----  
 M turtle GYNPPDLFIKWLSNGEEVISSKYINTVSIPE-----LGQSKLYFSYSSLSISEQEWNA-GNTYTCVVGHEALPLQVTQRTVD-----  
 M anole NFNPADLFMKWLHNDQPVSSSLHYFNSEPE-----SKQSEGYFAYSMLNINEQDWSA-GDSFTCVVGHEALPLFNTTQKTID-----  
 M gecko SFYPGDFFVKWLQDGEPPVSEYFTSGPIQE-----SKSPERYFAYSILNINEQDWSA-GARLTCVVGHEALPLQMTQKTVD-----  
 M duck GFNPPDLFIRWLRNGEPLPASSYVTMPVAE-----SQLARSYFTYSALSVATEDWGA-GNVFTCLVGHERLPLQVAQKSD-----  
 M pheasant GFNPPQFFVRWLKNGQTL PQSQSVTSSPMAE-----SPENESYVAYSLLRGAEEWGA-GNVYTCVVGHEALELQLLQKSVDKASGKASAVNVSLVL  
 M turkey GFNPPQFFFFRGLRNGESLPQTHSVSPSPMVE-----SPEKEFFVAYSVLRVGGEEWGA-GNIYPWGGGQEVLEFQLVQKSVDKASGKAGAVNFSLVL  
 M quail GFNPPDYFVRWLRNGEPLPQSHWLTTTPLNQGE-----DPINESYVAYSLLKVGAEWGA-GNVYSCLVGHEALPLQLAQKSVDKASGKSSAVNVSLVL  
 M chicken GFNPPHLFVRWLRNGEPLPQSQSVTSAPMAE-----NPENESYVAYSVLRVGAEEWGA-GNVYTCVVGHEALPLQLAQKSVDRASG-----  
 M echidna AFSPADVMVQWLHKGQPVPPDKYTVSAPPE-----PQSPNLHFAYSILTVAEEEWSA-GDSFTCIVVHEALPLYVMERTVD-----  
 M platypus SFSPADVMVQWLHKGQPVPPDKYTVSAPPE-----PQSPNLHFAYSILTVAEEEWSA-GDSFTCIVVHEALPLYVMERTVD-----  
 M opossum DFSPPDVVQWMHKGQPIPEKYVTSAPPE-----PQKGGRYFYSILTVSEAQWNS-GDPFTCVVAHEALPLSSTERTVD-----  
 M mouse GFSPADISVQWLQRGQLLPQEKYVTSAPPE-----PGAPGFYFTHSILTVTEEEWNS-GETYTCVVGHEALPHLVTERTVD-----  
 M human GFSPADVVFQWMQRGQPLSPKEYVTSAPPE-----PQAPGRYFAHSILTVSEEEWNT-GETYTCVA-HEALPNRVTERTVDKSTGKPTLYNVSLVM  
 X axolotl GFNPPDTLVKWLAKGKEVDFGSYATTSPLPSLTGGSY-----YRYSSLQVPAAEWTK-GDAFTCVVGHEA-LPMNLAQKSID-----  
 X frog GFNPKEIFIQWMQGGVSISEDKFINTVPMKSDGEQTY-----FIYSKLAIPAAKWNQ-GDVFTCVVGHEA-LPLYITQOSID-----  
 A gecko GFYPPEEFFVKWLRNDEPVGDEFFTSRPVQES-----KTPERYFTSSTINVNEQDWSA-GDHYTCVVGHEAL-PLQTTQKTVD-----  
 A duck GFRPRDILVTWTQDRPVASGSFSTFGPQEGEAGLFS-----VYSKLSVAAA EWQR-GDVFCVVGHDG-IPLNFVQKSLD-----  
 A pheasant SFLPSSILLTWTQQRNPVSTQNYLNFPGPVK-DGEFFS-----IYSKLVIPVSDWQR-GDVFGCVVGHDGIPLNFIQKNIDKSAGKASHVNVSVV  
 A turkey SFFPSSILLTWTQQRNPVSTQNYLNFPGPVK-DGDFFS-----LYSKLVIPVSDWQR-GDVFGCVVGHDG-VPLNFIQKSIDKSAGKASHVNVSVV  
 A quail SFLPSSILLTWTQQRNPVSTQNYLNFPGPVQ-DGGSYS-----AYSKLVVPASDWLR-GDVYGCVVGHDG-IPLGFIQKSLDKSAGKASHVNVSVV  
 A chicken SFLPSSILLTWTQQRNPVSTQNYLIFGPEK-DGDFYS-----LYSKLVKSVEDWQR-GDVYGCVVGHDG-IPLNFIHKRID-----  
 A echidna GFSPRELLVKWMKGGQEVPRTDYVTGTPQQEISEGSP-----TFFLYSTLRVQTSSWKS-GENFSCVVGHEA-LPLNFTQKTID-----  
 A1 platypus GFNPPDLLVKWLKGGQEVSTDYVTSSPQREASEGSAS-----TFFLYSTLRVPTSEWKE-GENYSCVVGHEA-LPLNFTQKTID-----  
 A2 platypus GFSPKELMVKWLKGGQEVPRKDYVTGSPQREVSEGSAS-----TFFLYSTLRVQTSTWKE-GENFSCVVGHEA-LPLNFTQKTID-----  
 A opossum GFSPEDVFIRWLKGS EELPKKDYITSNPYPEP-KSTS-----TYMVSSILQVQSTDWKN-ENKYSCVVGHEA-LPLNFTQQTID-----  
 A mouse AFNPKEVLRVWLHGNEELSPESYLVEPLKEPEGEGAT-----TYLVTSVLRVSAETWKQ-GDQYSCMVGHEA-LPMNFTQKTID-----  
 A1 human GFSPKDVLRVWLQGSQELPREKYLTVASRQEPSQGT-----TFAVTSILRVAAEDWKK-GDTFSCMVGHEA-LPLAFTQKTID-----  
 Y newt GFSPDDIYVQWKHRNTVLPDNSRNTALVLESQTN-----GPDTYFMSLLTISAKSNWEN-RDTYSCIAFHSAHPKNQMORSI-----  
 Y axolotl SFSPDDIYIQWKQKSVIPSDKYVSMERQEAETA-----GLGTYFYSMLTIQKSDWDK-RETFTCVAAHSVAPKNLMTRRI-----  
 Y frog NFRPQDIYVFWKKDGVTL EEDYYMTTTPVLEEE-----EEGFISFSLKTIARS DWMR-GATYSCIAAHTISQ-----  
 F frog GFYPKNVNVTVQONGSPMNASQVLSNEPQLNNGS-----GDNTYAMFSMITISKD-----  
 Y turtle GYYPAEISVKWMEHESQTSMPKPVTTSSMKE-----GDGDSTYFLYSKLPVDKTSWNN-GVYTCMVIHEALKPLKFTQRNI-----  
 Y anole NLNPKDVSQWLKDNNALEDNHITT-PVLKD-----SIEDSYFVYSKLLISRADWDR-GSSYTCMVIHEGL-AMKFTQRTVE-----  
 Y gecko GFNPEDISIKWLEHNNAVAGNNHVTT-QVQMD-----SDQDSFFVYSKLTVPKANWWD-GHSFTCHVVHEGF-SMKYTQRTIE-----



|              |                                                                                                       |
|--------------|-------------------------------------------------------------------------------------------------------|
| Y duck       | GFQPEHVEVQWLRNHNNSVPAAEFVTTPLKE-----PNGDG-TFFLYSKMTVPKASWQG-GVSYACMVVHEGL-PMRFTQR-----                |
| Y pheasant   | GFPPRDMEIRGFRDPRNVPTTFKVFVTTSLFPEKRSNGNANPGREGETYFVYSKMSVEPSGWRG-ATVYPCMVVQREAL-PMRFTIQPPWQKQLGK----- |
| Y turkey     | GFRPRDIEIRWLRDHRNVPTTDFVPISTFFPEERSRNGGPGREGETYFVYSKMSVEATSWRG-GTVFPCMVVQREAL-PMRFTQRTGQKQAGK-----    |
| Y quail      | GFRPRDIEIRWLRDHRVAVPSTSYVTTSVLPEVTSNGGGNGSDGKTYFVYSQMRVEVGEWRR-GTSYACMAVHEAL-PMRFSQRTLQKMPGK-----     |
| Y chicken    | GFRPRDIEIRWLRDHRVAVPATEFVTTAVLPEERTANG-AGGDGDTFFVYSKMSVETAKWNG-GTVFACMAVHEAL-PMRFSQRTL-----           |
| Y/O platypus | SFFPADIAVQWLHNDEDVEEDHFSVTKPQKDL-----TGQGTFFLYSKLDIQKSNWKR-GDSFTC-----                                |
| E platypus   | GFYPENISVRWLLDNKPLPTEHYRRTTKPLKDQ-----GDPAYFLYSRLAVNKSTWEQ-GNVYTCQVVHEALP-SRNTERKFQHTSGN-----         |
| E echidna    | GFYPRDVSVLWLLNNEELPTERYQTSKPLKDQ-----GDPAYFLYSRLAVNRSDEWV-STSYTCQVVHEALP-SRKTERTKQHPSTGN-----         |
| E opossum    | GFYPSSEISVQWLFNNEEDHTGHHTTTRPQKDH-----GTDPSFFLYSRMLVNKSIWEK-GNLVTCRVVHEALPGSRTLEKSLHYSAGN-----        |
| E brushtail  | AFYPADITVQWLRDNKDDHTGHHTTTRPHKDH-----GDPDSFFLYSRMVNRSHWQE-GHTFTCRVVHEALPGTRTLDKSLHYSTGN-----          |
| G echidna    | DFYPESTITVEWLQDDKVPVEADYASTLPQMH-----GSTFFMYSKLDVQKADWQR-GRAYSCSVKHEALPQKFLQKTV-----                  |
| G1 platypus  | DFYPDIAIAIDWQHNDRVPVEGDYATTLQKN-----GNSYFLYSKLTVQKTEWVQ-GGSFTCSVRHEALPQKFLQKTV-----                   |
| G2 platypus  | GFLPQDISIAWQHKGKEMKEEYSTTPPQYR-----NGSYFLYSKLTVTKKDWT-GESFSCLVYHDS-----                               |
| G opossum    | NFFPEDVVIEWQKNNNPESEDKYYTTPPTRE-----KSTYFFYSKLIIVKKRDWVQ-NNSYTCVVLHEAFPNQISQRTI-----                  |
| G mouse      | DFYPEDITVEWQWNGQPA-ENYKNTQPIMNT-----NGSYFVYSKLVNQQSNWEA-GNTFTCSVLHEGLHNHHTKSL-----                    |
| G human      | GFYPSDIAVEWESNGQPE-NNYKTTTPVLDL-----DGSFFLYSKLTVDKSRWQQ-GNVFSCSVMHEALHNHYTQKSL-----                   |
| T zebrafish  | SPNLGDVYIMWKVNNFTTEGKSSDPIQQQGSTS-----VVSILTISKKEFENPETTINCAVVHANMKDTASPLLKST-----                    |
| T trout      | SPSLCDVYIMWKEDSGEYQEGVTSPPQKTKKG-----NYFVTSVFTTTTKDKWDT-NVLFTCAVKHAGSDNSTS-----                       |

|            |           |
|------------|-----------|
|            | .... .... |
| M newt     | -----     |
| M axolotl  | -----     |
| M frog     | -----     |
| M slider   | -----     |
| M turtle   | -----     |
| M anole    | -----     |
| M gecko    | -----     |
| M duck     | -----     |
| M pheasant | ADSAAACYN |
| M turkey   | ADSVAPCF- |
| M quail    | ADSASACY- |
| M chicken  | -----     |
| M echidna  | -----     |
| M platypus | -----     |
| M opossum  | -----     |
| M mouse    | -----     |
| M human    | SDTAGTCY- |
| X axolotl  | -----     |
| X frog     | -----     |
| A gecko    | -----     |
| A duck     | -----     |
| A pheasant | LSDDVTCY  |
| A turkey   | LSDDVTCY  |
| A quail    | LADSEVSCY |
| A chicken  | -----     |

**Supplemental Figure 3. Amino acid alignment of constant regions of vertebrate immunoglobulins used in Figure 6 phylogeny.** Sequences (database accession numbers in Supplemental Table 3) were aligned using Clustal in MEGA then manually adjusted based on cysteine residues in paralogous domains. That alignment was used for the dendrogram and exported to Bioedit for creation of this figure.

|              |       |
|--------------|-------|
| A echidna    | ----- |
| A1 platypus  | ----- |
| A2 platypus  | ----- |
| A opossum    | ----- |
| A mouse      | ----- |
| A1 human     | ----- |
| Y newt       | ----- |
| Y axolotl    | ----- |
| Y frog       | ----- |
| F frog       | ----- |
| Y turtle     | ----- |
| Y anole      | ----- |
| Y gecko      | ----- |
| Y duck       | ----- |
| Y pheasant   | ----- |
| Y turkey     | ----- |
| Y quail      | ----- |
| Y chicken    | ----- |
| Y/O platypus | ----- |
| E platypus   | ----- |
| E echidna    | ----- |
| E opossum    | ----- |
| E brushtail  | ----- |
| G echidna    | ----- |
| G1 platypus  | ----- |
| G2 platypus  | ----- |
| G opossum    | ----- |
| G mouse      | ----- |
| G human      | ----- |
| T zebrafish  | ----- |
| T trout      | ----- |

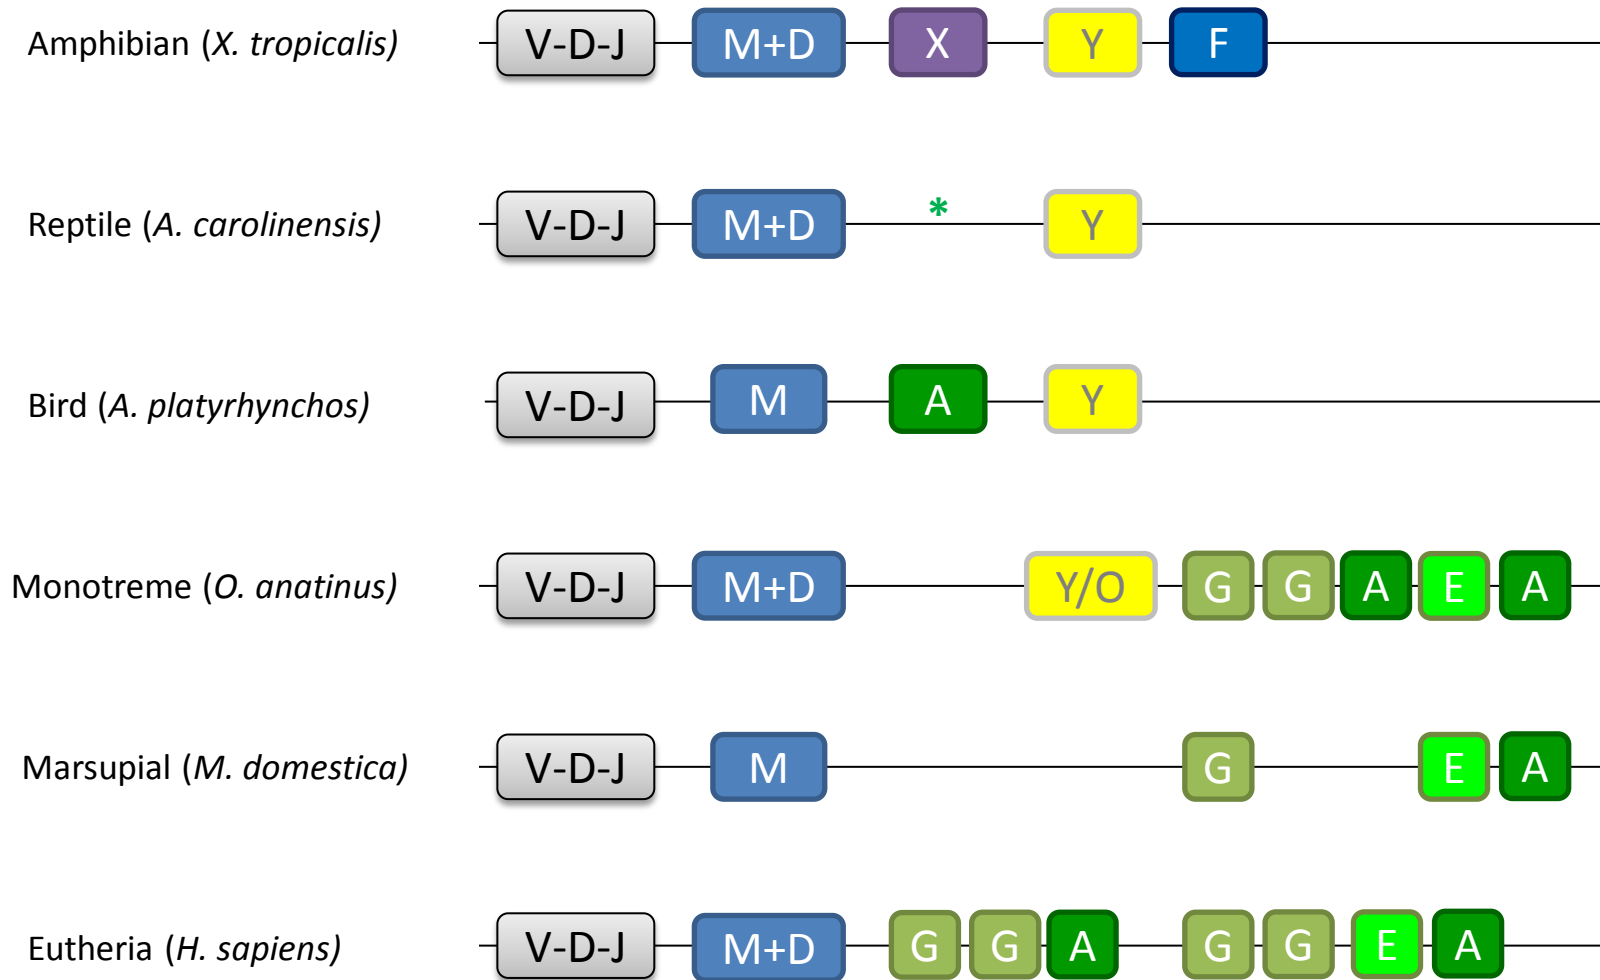

**Supplemental Figure 4. Genomic synteny of IgX is consistent with its giving rise to IgA.** Genomic assemblies and published genomic studies of the IgH locus were used to compare the position of the constant genes of IgX of amphibians with IgA of birds and mammals. The asterisk denotes that IgA is present in some reptiles such as the leopard gecko though genomic data is lacking.
